# Supplementary material for: An advanced Bayesian model for the visual tracking of multiple interacting objects
Source: Springer Nature journal article supplement (doi:10.1186/1687-6180-2011-130), 2011-12-01
Supplement: 13634_2011_111_MOESM6_ESM.pdf [file 13634_2011_111_MOESM6_ESM.pdf]

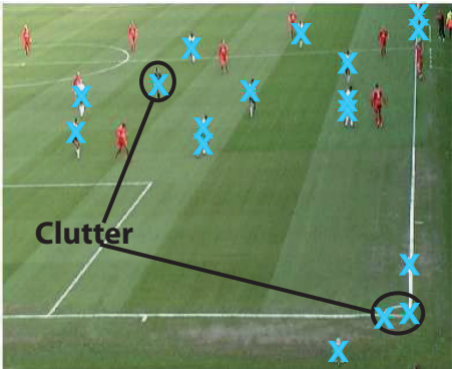

**Clutter**
